# Supplementary material
Source: publisher figshare collection journal article supplement (https://gsajournals.figshare.com/ndownloader/files/12447440)
Supplement: Supplementary file 1 [file 12447440]

## Sheet: Data
Table S1. A list of lines that are used in this study
10C				16C				Green house
Ecotype ID	FTime	FLC		Ecotype ID	FTime	FLC		Ecotype ID	FTime	FLC
1061	96	17.256		991	176	44.007		8426	25.5211	0.017
1062	82	28.226		992	160	47.932		6960	23.2136	0.241
1063	75	6.267		1061	88	39.446		6963	55.9095	1.371
1074	91	40.643		1062	67	13.522		8256	25.9406	0.037
1254	89	26.587		1063	55	16.851		6967	29.6221	0.021
5832	87	25.649		1074	129	37.03		6966	38.2272	0.995
5856	119	35.844		1137	155	48.617		8387	31.4561	0.058
5867	122	42.441		1158	105	48.381		6968	167.846	2.197
6011	85	34.294		1254	103	51.765		8259	28.6838	0.364
6012	94	43.205		1257	80	46.814		8258	32.6669	0.338
6013	101	28.52		1317	80	44.889		6008	24.379	0.018
6016	75	32.828		1552	119	51.638		6009	163.224	0.939
6021	102	48.554		5832	66	29.812		7517	165.903	1.91
6023	94	42.097		5856	107	57.3		7515	63.0945	0.272
6030	105	42.481		5867	190	55.445		7514	42.2876	0.183
6034	92	32.784		6011	95	48.983		6243	28.3952	0.248
6036	82	14.335		6012	126	46.114		8222	126.273	1.265
6039	66	6.776		6013	101	35.141		6915	37.1818	0.463
6040	71	38.776		6016	89	52.966		6917	167.759	1.287
6042	56	12.804		6021	86	46.731		6911	26.1398	2.179
6043	90	38.325		6023	77	46.066		8334	36.1066	1.69
6046	93	38.989		6030	153	45.139		8335	33.8426	2.782
6069	111	43.83		6034	87	48.997		6918	168.038	0.951
6070	96	35.578		6036	68	28.592		6919	30.1221	0.7
6071	109	42.621		6039	46	13.096		6016	125.997	2.084
6074	91	44.556		6040	75	58.096		7523	92.2434	0.889
6076	115	41.206		6042	33	12.796		7520	31.4996	0.155
6085	125	60.256		6043	190	59.268		7521	43.4256	1.111
6090	92	34.686		6046	190	64.712		7525	31.425	0.138
6092	104	32.593		6069	107	47.606		8233	74.4652	0.627
6098	85	29.211		6070	125	54.644		8231	92.2244	1.882
6100	115	52.925		6071	125	45.002		8236	30.3491	0.114
6102	118	43.621		6073	89	58.972		8235	63.244	1.169
6104	101	37.016		6074	83	63.699		8239	28.5456	0.062
6105	102	37.256		6076	148	43.8		6984	29.2733	0.044
6109	118	34.797		6085	190	52.014		6982	25.818	0.047
6112	97	45.052		6088	140	48.686		6981	22.4698	0.025
6113	123	46.722		6090	90	38.743		6907	38.318	0.857
6114	104	42.695		6092	79	41.166		6904	48.3199	6.27
6118	103	36.279		6098	109	59.576		6903	35.4095	0.369
6122	96	42.099		6100	105	60.143		6900	165.154	1.113
6124	125	42.649		6102	190	46.322		8326	42.1228	0.245
6125	108	27.431		6104	115	45.574		6909	25.5152	0.127
6126	120	39.883		6105	118	41.911		6908	37.4853	1.293
6127	106	34.38		6108	59	46.871		6064	166.221	1.234
6128	117	48.757		6109	135	33.224		6932	25.5313	0.111
6131	109	40.477		6112	74	55.002		6933	43.3479	2.597
6132	103	23.46		6113	155	44.321		8284	78.3485	0.85
6136	86	42.239		6114	95	62.658		6931	34.5953	0.106
6149	89	27.771		6118	105	34.915		8283	32.4035	2.073
6150	84	28.012		6122	104	47.054		8354	29.8491	0.361
6151	108	34.335		6124	113	49.883		6074	103.574	1.628
6153	109	47.896		6125	117	42.399		8214	35.4244	0.96
6172	80	26.798		6126	107	40.974		8290	25.0504	0.157
6173	90	23.864		6127	172	38.698		6929	38.9847	1.02
6180	58	3.674		6128	182	49.272		8297	148.301	4.352
6184	85	54.142		6131	190	46.866		8343	27.9406	0.166
6189	73	5.121		6132	84	41.601		6924	29.4555	0.071
6191	68	12.083		6136	86	33.804		6927	66.3342	0.382
6192	76	9.383		6142	101	41.632		6926	30.2434	0.383
6193	71	1.225		6147	165	36.404		6920	70.0326	0.802
6202	115	61.863		6149	110	43.13		6923	25.2733	0.289
6209	90	41.552		6150	84	42.758		6922	26.1377	0.125
6210	89	31.453		6151	102	74.714		6961	55.5767	3.63
6216	118	61.492		6153	190	45.345		6042	24.4555	0.052
6221	105	33.86		6172	100	57.944		6043	166.469	1.49
6231	110	31.929		6173	78	35.448		6040	65.1273	2.321
6235	107	41.141		6180	33	11.16		8376	164.263	1.629
6237	88	49.673		6184	95	47.216		7296	27.5158	0.109
6238	99	39.302		6188	41	11.929		6958	24.2279	3.397
6242	94	23.21		6189	41	10.119		6959	37.3504	0.459
6243	56	19.019		6191	49	24.769		6951	34.0625	0.661
6244	108	42.459		6192	46	14.493		6956	45.6066	1.3
6252	105	50.28		6193	45	5.904		6957	54.4853	2.175
6258	107	28.644		6195	54	4.735		7081	30.4263	0.849
6276	109	41.605		6202	129	58.41		8285	28.0015	0.06
6413	113	50.31		6203	145	111.642		8369	168.936	3.065
6901	86	30.602		6209	112	63.005		9058	168.391	3.971
6909	51	8.757		6210	106	53.326		6897	50.0923	2.867
6913	99	44.588		6216	190	50.259		6943	24.3945	0.162
6973	53	3.794		6221	170	44.678		6898	20.7882	0.111
7516	100	37.603		6231	190	46.273		6940	24.4549	0.096
7519	76	35.682		6235	190	57.284		6945	40.4885	0.858
8222	90	47.722		6237	100	41.741		6944	24.4424	0.203
8227	113	37.191		6238	120	56.627		9057	40.2577	0.175
8234	99	34.338		6242	84	39.644		6976	57.5152	1.849
8237	97	36.435		6243	41	45.753		6974	162.694	1.346
8240	93	37.356		6244	101	47.064		6975	29.879	0.116
8241	73	15.648		6252	190	46.292		6973	28.6377	0.045
8242	120	36.312		6258	131	37.739		6970	37.7428	3.633
8249	81	40.437		6276	151	41.985		6971	64.2666	2.26
8256	61	5.502		6413	121	52.225		6979	22.2447	0.055
8283	71	38.283		6901	185	48.172		8424	59.1042	5.958
8326	67	17.406		6913	190	45.564		8249	103.671	1.183
8334	64	9.908		6973	40	4.183		8311	57.4866	1.516
8335	104	40.191		6974	137	61.561		8312	26.152	0.328
8351	78	35.676		7516	131	33.92		8243	66.8893	3.598
8369	76	44.471		7517	143	39.933		8241	52.2428	0.37
8376	84	34.12		7519	84	43.037		8247	159.843	3.151
8387	52	4.717		8222	77	44.59		5837	34.8845	0.813
8422	106	37.878		8227	155	59.941		7461	30.9704	0.469
8426	49	3.384		8234	190	36.528
9057	76	12.656		8237	87	62.903
9323	100	41.3		8240	100	35.955
9332	90	39.298		8241	53	29.576
9336	84	33.373		8242	163	55.137
9339	97	38.565		8247	77	8.85
9352	105	58.902		8249	68	52.706
9353	106	49.317		8256	41	4.823
9363	120	50.486		8258	50	28.135
9369	80	30.353		8259	48	21.852
9371	106	41.182		8283	157	57.248
9381	96	62.418		8326	49	31.08
9382	99	44.57		8334	46	21.271
9383	96	45.206		8335	110	43.304
9390	70	11.146		8351	139	37.062
9391	73	12.148		8369	64	51.85
9394	104	43.851		8376	156	40.002
9395	98	57.901		8387	45	7.99
9399	102	29.333		8422	121	49.766
9412	86	12.153		8426	32	8.208
9413	76	15.334		9057	50	28.961
9416	115	63.628		9323	116	49.555
9427	91	35.303		9332	121	36.091
9434	108	42.41		9336	53	47.802
9436	99	40.905		9339	125	53.427
9437	77	23.556		9352	190	46.708
9452	106	29.346		9353	190	50.78
9454	105	39.731		9363	151	49.544
9470	91	42.612		9369	69	53.052
991	97	45.401		9371	190	49.234
992	100	39.815		9380	105	48.822
				9381	83	65.66
				9382	151	45.113
				9383	104	48.116
				9390	42	28.464
				9391	47	46.709
				9392	45	24.808
				9394	142	41.603
				9395	97	48.618
				9399	119	47.284
				9412	61	23.198
				9413	52	41.249
				9416	190	64.555
				9427	132	44.541
				9434	161	61.979
				9436	119	36.381
				9437	51	39.509
				9452	94	40.192
				9454	182	39.361
				9470	107	47.449
				9481	137	52.737
				6909	42	6.087
